1 **Metagenomic analysis of soil samples collected from estuarine mangroves of Arabian Sea**  
2 **reveals rich microbiota and high numbers of sulphate reducing bacteria accompanied with**  
3 **methanogen bacteria.**

4

5 Mandar S. Paingankar<sup>#</sup> and Deepti D. Deobagkar \*

6

7 Molecular Biology Research Laboratory, Centre for Advanced Studies, Department of Zoology,  
8 Savitribai Phule Pune University, Pune - 411 007, India.

9

10 <sup>#</sup> Current address: Department of Zoology, Government Science College, Chamorshi Road,  
11 Gadchiroli - 442605, Maharashtra, India.

12

13

14 \*Corresponding Author:

15 Deepti D. Deobagkar,

16 ISRO Chair Professor,

17 Department of Zoology, Centre for Advance Studies,

18 Savitribai Phule Pune University, Pune 411007, India.

19 Contact : +919921184871.

20 [deepti.deobagkar@gmail.com](mailto:deepti.deobagkar@gmail.com)

21 **Abstract**

22 This study reports the analyses of the microbiome of the estuarine soil of mangroves of the  
23 Arabian Sea. Mangroves soil samples were collected from 12 locations of Arabian Sea coast of  
24 Maharashtra, India. 16S rRNA gene V3–V4 region amplicon sequencing was performed using  
25 the Miseq Illumina platform to identify the microbial communities present in the mangroves  
26 ecosystem. The metagenomics analysis provided an insight into the abundance, diversity and  
27 spatial variations in the mangrove microbial communities in relation to physico-chemical  
28 parameters and revealed that Proteobacteria, Flavobacteria and Planctomycetes are abundant in  
29 mangroves system. The differences in bacterial abundance, composition and diversity can partly  
30 be attributed to the physico-chemical characteristics of the samples, geographical location and  
31 anthropogenic activities in the locality. High numbers of sulphate reducing bacteria accompanied  
32 with methanogen bacteria were characteristic of Indian mangroves. The results obtained in the  
33 current study indicate rich species diversity and add valuable insights about the diversity of  
34 microbial communities of the mangroves in Maharashtra along the west coast of India and can  
35 provide better information for effective measures for conservation of mangroves. GIS based  
36 prediction suggest that the sulphur utilizing communities are under threat from anthropogenic  
37 activities and may decline in future if immediate measures are not implemented.

38

39 **Keywords:** Mangroves of west coast, Metagenomics, Microbial ecology, pollution

## 40 **Introduction**

41 Mangroves system is known to play an important role maintaining the sea level and protecting  
42 the coast. These mangrove systems are characterized by structurally and functionally unique salt-  
43 tolerant, arboreal, flowering plant forests<sup>1</sup>. Taxonomically diverse group of plants and associated  
44 microbial communities are known to play fundamental roles in the nutrient cycle, productivity,  
45 functioning, and maintenance of the mangrove ecosystem<sup>2</sup>. The mangrove microbial community  
46 plays an integral role in nutrients cycling and thus nurturing the sustainable productivity<sup>3</sup>.  
47 Furthermore, fluctuations in temperature, aerobic conditions and salinity make these microbial  
48 communities more complex, diverse and unique<sup>4</sup>. Understanding the complex nature of mangrove  
49 microbial communities is one of the important aspects in microbes-plant interaction dynamics<sup>3</sup>.  
50 Similarly, microbes-plant interactions in mangroves have great implications in local and global  
51 ecological impact<sup>5-8</sup>. Furthermore these microbes are known to provide interesting biomolecules  
52 for human welfare<sup>9</sup>. Therefore exploration and identification of microbial communities in  
53 mangroves system have a potential application in human welfare as well as ecological  
54 conservation.

55 The microbial community studies have been carried out by various research groups to  
56 understand the role of microbial communities in the complex functioning of mangrove  
57 ecosystems<sup>10-21</sup>. In recent years, this ecosystem is rapidly getting destroyed and is threatened due  
58 to anthropological activities and modernisation<sup>22-23</sup>. In India, mangroves are present on eastern  
59 coastline, western coastline and in the Andaman and Nicobar Islands and are spread over an area  
60 of 4,921 sq. km. Presence of unique microbial communities in Sundarbans of India and  
61 Andaman Nicobar islands have been documented by various workers<sup>12,13,16,18</sup>. While on western  
62 coastline of India, mangroves are concentrated in Gujarat and Maharashtra. The mangroves of

63 India are under immense pressure of conversion in to agriculture land and discharge of organic  
64 and inorganic matter from rapidly developing cities<sup>9,23</sup>. Mumbai, Thane, Raigad and Ratnagiri  
65 area in Maharashtra state are developing rapidly and anthropogenic activities in these are  
66 exerting the tremendous pressure on flora, fauna and microbial diversity<sup>23,24</sup>. Very few studies  
67 have been conducted to understand the microbial communities present in mangrove ecosystems  
68 of western coastline India<sup>20,21,24</sup>. Comparative studies on distinct mangrove microbial  
69 communities based on metagenomics will provide better insights into microbial community  
70 structure in the mangroves of India. Therefore the metagenomics explorative studies on  
71 microbial community structure in mangroves of India is essential in acquiring the baseline data  
72 on the diversity and functional genomics of microbial communities at higher resolution and in  
73 greater depth. The objective of the present study was to identify and to provide baseline data on  
74 the microbial community structure present in different mangrove areas along the west coast in  
75 Maharashtra State, India using the Illumina MiSeq sequencing platform.

76

## 77 **Material and Methods**

### 78 *Ethics Statement*

79 The collection sites of the current study are not part of any reserve forest or National park or  
80 privately-owned areas and therefore no specific permits were needed for the field studies.  
81 Endangered or protected species were not collected or included in the study.

### 82 *Sample Collection*

83 Information on mangroves of India and shape files for GIS mapping were retrieved from earlier  
84 reports<sup>22,23</sup>. Sediment samples were collected superficially (0-5 cm depth) during the period of  
85 low tide at the GPS coordinates. Anjarle (17.840N, 73.101E and 17.843N, 73.103E),

86 Kelashi(17.928N,73.074E and 17.931N, 73.077E), Bankot(17.958N, 73.031E and  
87 17.961N,73.033E), Uran(18.896,72N.939E and 18.898N,72.944E), Agarkot(18.546N,72.934E  
88 and 18.549N,72.943E), Vashim(18.812N,73.033E and 18.814N,73.026E). These mangrove  
89 forests were located in estuarian regions of the Jog, Bharja, Savitri, Kundalika and  
90 Patalganga rivers of Maharashtra, India (Supplementary Information Table S1).

#### 91 *Environmental parameters*

92 The average temperature, average rainfall, pH, SO<sub>4</sub>, NO<sub>3</sub>, PO<sub>4</sub>, Mg, Cl<sub>2</sub> and salinity of samples  
93 was measured and is depicted in Supplementary information Table S2.

#### 94 *DNA extraction from soil samples*

95 Soil collected from respective samples was processed for DNA isolation using Powersoil DNA  
96 isolation kit (MoBio laboratories Inc. Carlsbad, CA) as per manufacturer's instructions. DNA  
97 concentration was measured using the Quantus fluorimeter (Promega, USA).

#### 98 *Amplification primers*

99 Regions corresponding to V3 and V4 regions of 16s rRNA were amplified from the DNA  
100 samples and were subjected to pyrosequencing using the Miseq Illumina platform.

#### 101 *Sequence analysis*

102 Sequence analysis was carried out by employing the methods described earlier<sup>24</sup>. The taxonomic  
103 assignment of unassembled metagenomic sequences was performed using BLASTX against the  
104 SEED and Pfam databases on the MG-RAST server v2.0 (<http://metagenomics.nmpdr.org>) using  
105 a cut-off E-value of 1e-10. BLASTX was also used to conduct a similarity search against the  
106 NCBI-NR database, and MetaGenome Analyzer software (MEGAN  
107 v6.0)<sup>25</sup> (<https://github.com/danielhuson/megan-ce>) with the LCA algorithm (maximum number of  
108 matches per read: 5, min support: 5, min score: 35, top percent:10) was used to visualize results.

109 *Statistical analysis*

110 Several indices of clonal diversity were estimated using the MEGAN and PAST3 program  
111 available from the University of Oslo website link (<http://folk.uio.no/ohammer/past>). A  
112 similarity matrix was generated using a probabilistic distance metric. The statistical significance  
113 of the relationship between the differences in chemical composition and (i) species diversity, (ii)  
114 species alpha diversity indices and (iii) species beta diversity indices was tested by Mantel tests.  
115 P values were calculated using 9999 permutations on rows and columns of dissimilarity matrices.

116 *GIS mapping and prediction using DIVA GIS and MAXent*

117 The mangroves sulphur utilizing bacteria data was retrieved from current study and earlier  
118 study<sup>24</sup>. The baseline (1950–2000) temperature and precipitation layers were obtained  
119 from WorldClim-Global Climate data repository ([www.worldclim.org](http://www.worldclim.org)). Temperature and  
120 precipitation layers of the future (year 2020, year 2030) were obtained from repository  
121 ([www.ccafs-climate.org](http://www.ccafs-climate.org)). The data were resampled at the native WorldClim 30 arcsec  
122 (approximately 1x1km) resolution. Statistical modelling was conducted with DIVA GIS  
123 and MAXENT ([https://biodiversityinformatics.amnh.org/open\\_source/maxent/](https://biodiversityinformatics.amnh.org/open_source/maxent/)) software with  
124 the present data and from the environmental variables.

125

126 **Results**

127 *Description of the Community*

128 Sequence clustering resulted in the identification of 1357 (364.16±84.80 per sample) different  
129 bacterial species (Supplementary Information Table S3). In general, Proteobacteria and  
130 Bacteroidetes were more abundant and other taxon such as Cyanobacteria, Euryarchaeota,  
131 Chloroflexi and Verrucomicrobia were present at moderate abundance. The Acidobacteria were

132 more abundant in Kelashi sample whereas Fusobacteria showed moderate abundance in the Uran  
133 sample. The numbers of sequences affiliated with each taxon are depicted in Figure 2A, with a  
134 major abundance of Gammaproteobacteria (8.86-20.26 %), Flavobacteriia (7.24-25.76%),  
135 Alphaproteobacteria (9.34-24.65%), Deltaproteobacteria (2.88-14.57%) and Actinobacteria  
136 (0.17-6.1%) followed by other minor class represented by Planctomycetia (1.2-3.57%). Sulphate  
137 utilizer species such as *Desulfobulbus mediterraneus*, *Desulfomicrobium sp.*, *Desulfonatronum*  
138 *thiosulfatophilum*, *Desulfosarcina sp.* were present in most of the samples. These sulphate  
139 reducers were accompanied by methanogens at all sites. *Aciditerrimonas ferrireducens*,  
140 *Algisphaera agarilytica*, *Ardenticatena maritima*, *Bacteriovorax marinus*,  
141 *Bdellovibriobacteriovorus*, *Bellilinea caldifistulae*, *Blastocatella fastidiosa*, *Blastopirellula*  
142 *marina*, *Calothrixdesertica*, *Candidatus Solibacterusitatus*, *Litorilineaaerophila*, *Ornatilinea*  
143 *apprima*, *Owenweeksia hongkongensis*, *Phycisphaera mikurensis* *Thiohalobacterthiocyanaticus*  
144 *Trueperaradiovictrix* were present in moderate numbers in all collected samples.  
145 *Deferrisomacamini* exclusively present in ASUN samples whereas *Nafulsella turpanensis*  
146 *Roseiflexus sp.* RS-1 exclusively present in KLM samples. Species such as *Lewinella nigricans*  
147 *Methanomassiliicoccus luminyensis*, *Methanothermococcus kinawensis*, *Robiginitaleabiformata*  
148 showed moderate presence in all sampling sites except KLM samples. *Ignavibacterium album*  
149 and *Ilumatobacter fluminis* were present in moderate numbers only in ASUN, ASWD, BNM  
150 samples whereas *Gramella aestuarii* present significant number only in ADM BNM samples.

#### 151 *Alpha and Beta diversity of bacterial communities in different mangrove soil samples*

152 Alpha and beta diversity analysis revealed rich taxonomic diversity and dominance of few  
153 species in mangroves samples (Supplementary Information Table S4; S5). Interestingly, soil  
154 samples from KLM1 (D = 0.06438), KLM2 (D = 0.03303), VASH1 (D = 0.03259) and VASH2

155 (D = 0.03802) showed higher dominance of fewer bacterial groups. Chao-1 analysis identified  
156 (274-729) species in each sample. At species level, high beta diversity was observed in all  
157 mangrove samples (Supplementary Information Table S5) wherein 36 species were common in  
158 all 12 samples. ASUN1 sample showed maximum number (61) of unique species.

### 159 *Habitat Type Differences in Communities*

160 In order to examine the community structure and its specific features, PCoA analysis was carried  
161 out. Most samples clustered closely together, indicating that the microbial communities residing  
162 in these mangroves are similar and represent characteristic and typical community structures.  
163 Interestingly, communities in the mangroves facing industrialization threats, KLM1, KLM2 and  
164 ADM1, ADM 2 were different from all other (Fig. 3A). Similarly, neighbour joining tree  
165 revealed the distinctness of KLM1, KLM2 and ADM1, ADM 2 samples (Fig. 3B). Canonical  
166 correlation analysis (CCorA) was employed to find out the correlations between alpha diversity  
167 indices and environmental factors. A strong positive correlation was observed between the SO<sub>4</sub>  
168 concentration and relative dominance of a few species. A positive correlation was observed in  
169 PO<sub>4</sub> and Cl<sub>2</sub> concentration and Berger-Parker index in samples. A negative correlation was  
170 observed in NO<sub>3</sub> concentration and dominance in samples (Fig. 4A). Mantel test was used to  
171 determine the factors (diversity, chemical parameters, and Whitaker beta diversity) which best  
172 predicted the community diversity across the different mangrove areas samples (Fig. 4B).  
173 Differences in chemical parameters correlated significantly with diversity across different  
174 collection sites ( $r = 0.278$ ;  $p$  value = 0.02). Similarly, chemical parameters of soil had significant  
175 effect on diversity and beta diversity ( $r = 0.717$ ;  $p$  value = 0.0001). These results indicated that  
176 soil chemical composition and presence of pollutants is playing an important role and influences  
177 the bacterial diversity.



178 *GIS based prediction of distribution of sulphur utilizing bacteria in Maharashtra*

179 Using the current climate layers (68 layers) the distribution of sulphur utilizing bacteria in  
180 Maharashtra was predicted (Fig. 5). The prediction suggests that areas such as Dighi, Chiplun,  
181 Uran, Jawaharlal Nehru port are suitable for growth of sulphur utilizing bacteria. Based on future  
182 climatic conditions, sulphur bacteria prediction map for the year 2020 and 2030 was predicted.  
183 The prediction suggests that area suitable for growth of sulphur utilizing bacteria will be decline  
184 in 2020 and 2030 (Fig. 5).

185

186 **Discussion**

187 The mangroves of India are under tremendous pressure of anthropogenic activities and are  
188 rapidly declining<sup>23</sup>. Maharashtra state of the west coast of India is one of the rapidly  
189 industrializing and urbanizing region and discharging a huge amount of industrial and organic  
190 waste to Arabian Sea<sup>26,27</sup>. Jha Fernandes. The draining of industrial and domestic waste the  
191 mangroves of Maharashtra is significantly affecting the mangroves and associated flora, fauna and  
192 microbes. Therefore there is urgent need to gather the baseline data of microbes associated with  
193 mangroves as they play important role in mangroves ecosystem dynamics. In the current study  
194 metagenomic profiles of mangrove sediments of west coastline of India was carried out using the  
195 miSeq Illumina platform. All the samples showed the high abundance of bacterial reads and a  
196 small percentage of sequences from Archaea and unidentified organisms.

197 A taxonomic analysis of samples collected from Kerala, Tamil Nadu, Sundarbans,  
198 Andaman Nicobar islands, Maharashtra and current study clearly indicates the higher abundance  
199 of Proteobacteria in the mangroves sediments<sup>12,16,17,18,20,21,24</sup> (Fig. 2A). The metagenomic  
200 analysis identified more than 80% species inhabited in these mangrove sediments (Fig.2B).

201 Among the Proteobacteria detected, Gammaproteobacteria were most abundant followed by  
202 Alphaproteobacteria. The nifH gene, the key players in nitrogen fixation, has been detected  
203 predominantly Alphaproteobacteria, Betaproteobacteria, and Gammaproteobacteria<sup>30-32</sup>(Fig.  
204 2A).Along with Proteobacteria, *Bacteroidetes*, *Acidobacteria*, *Firmicutes*, *Actinobacteria*,  
205 *Nitrospirae*, *Cyanobacteria*, and *Planctomycetes* were also showed their moderate presence in  
206 the current study and Indian mangroves<sup>12,16,17,18,20,21,24</sup>. A similar patterns were obtained from the  
207 samples belonging to mangroves areas of different parts of the world<sup>11,14,15,19,20,21,28,29</sup>. As  
208 compared to Indian and Brazilian mangrove samples, Red sea mangrove samples showed  
209 relatively higher number of Achaea<sup>12,16- 21,24</sup>.Bacteroidetes known for hydrocarbon degradation  
210 and substantial abundance of Bacteroidetes has been previously noted from mangroves  
211 samples<sup>10,16,20,21,24,33</sup>.The mixed marine and terrestrial conditions in mangroves are suitable for  
212 nitrogen fixer proteobacteria and Bacteroidetes. Current study and samples collected from Kerala  
213 showed the moderate numbers of Actinobacteria<sup>20,21</sup>. Although Chloroflexi and Verrucomicrobia  
214 detected routinely in metagenomics analysis, little is known about the possible role of these  
215 bacterial phyla. Samples from Indian mangroves showed the presence of high numbers of  
216 sulphate reducing bacteriaaccompanied with methanogen bacteria. Sulphate reducing bacteria,  
217 such as *Desulfobulbus*, *Desulfomicrobium*, *Desulfonatrum*, *Desulfosarcina*were found  
218 accompanied with methanogen genera, including *Methanothermobacter*, *Methanococcus*,  
219 *Methanocaldococcus*, *Methanosarcina*, *Methanococcoides*, *Methanospirillum*<sup>12,16,17,18,20,21,24</sup>. The  
220 results obtained in current study and earlier studies clearly suggest that sulphate reducers and  
221 methanogens might be using the different metabolic pathways in non-competitive manner to  
222 shape up the microbial metabolism in mangroves ecosystem<sup>34-38</sup>. Sequence reads assign to

223 aromatic hydrocarbons degraders and an iron and sulphur-reducing mesophilic anaerobe were  
224 found significantly lower in Indian mangroves samples.

225         The alpha and beta diversity indices clearly indicate the presence of high species richness  
226 and high diversity in these samples. PCoA and neighbour joining analysis clearly suggest the  
227 distinctness of KLM and ADM samples from rest of the samples (Fig. 3A,3B). Relatively less  
228 organic and inorganic pollution might be responsible for distinctness of KLM and ADM  
229 samples. The Canonical correlation analysis and Mantel test clearly suggest that chemical  
230 properties of soil sediments and micro environment in this ecological niche influenced bacterial  
231 diversity in these mangrove areas (Fig. 4A;4B). It has been well documented that geographical  
232 location, plant species, and/or physico-chemical parameters play an important role in shaping the  
233 microbial structure. The observed variation in microbial diversity and composition in studied  
234 samples might be attributed to the environmental factors and anthropogenic activities in  
235 respective mangrove forests.

236         GIS based prediction tools are important in examining the potential problems arising  
237 from natural and artificial forces on environment as well as microhabitats. Furthermore, GIS is  
238 one of the important tools which can be used in ecology to preserve and monitor the makeup of  
239 biological life within a given area. However, its use in predicting microbial ecology is  
240 limited<sup>39,40</sup>. In the current study GIS prediction was used to predict the sulphur utilizing bacteria  
241 in Maharashtra region. Similarly future climate data was used to predict the trends of sulphur  
242 utilizing bacteria in response to climate change. Using current climate condition layers (total 68  
243 layers) the distribution of sulphur utilizing bacteria in Maharashtra was predicted. The prediction  
244 suggests that climatic conditions in Raigad district especially near Dighi, Uran and Jawaharlal  
245 Nehru port are suitable for growth of sulphur utilizing bacteria. These bacteria are useful in

246 recycling of various compounds such as sulphates, alkanes and many more. The prediction using  
247 future data suggest the decrease in suitable area for growth of these sulphur utilizing bacteria.  
248 These observations suggest that anthropogenic activities will upset the delicate ecology of these  
249 microbes and may lead to massive effect on flora, fauna and human welfare. Therefore there is  
250 urgent need to conserve this ecologically delicate and important niche

251 In conclusion, present study identified the presence of novel groups of bacteria (Fig.6).  
252 The current study generated the baseline data of bacterial diversity and composition in sediments  
253 of mangroves of west coast of India. The data obtained in the current study clearly indicate that  
254 biogeochemical parameters, anthropogenic activities and micro niche play an important role in  
255 structuring the bacterial diversity. GIS based prediction suggests that the mangrove microbial  
256 communities may decline in future if immediate conservation measures are not implemented.

257

## 258 **Acknowledgement**

259 We thank Prof. Dileep N. Deobagkar for his valuable suggestions.

260

## 261 **Funding**

262 The authors would like to acknowledge financial support provided by the Ministry of Earth  
263 Sciences (MoES), India and UGC-UPE-II.

264

## 265 **Conflict of interests**

266 The authors declare that they have no competing interests.

267

## 268 **References**

- 269 1. Alongi, D. M., Present state and future of the world's mangrove forests. *Environ. Conserv.*  
270 2002, **29(3)**, 331–349.
- 271 2. McLusky, D. *The estuarine ecosystem*. Springer Science and Business Media 2013.
- 272 3. Field, C. *et al.*, Mangrove biodiversity and ecosystem function. *Global Ecol. Biogeogr. Lett.*  
273 1998, **7**, 3-14.
- 274 4. Duke, N.C. *et al.*, A world without mangroves. *Science*, 2007, **317**, 41.
- 275 5. Gomes, N.C.M., Borges, L.R., Paranhos, R., Pinto, F.N., Mendonça-Hagler, L.C. and Smalla,  
276 K. Exploring the diversity of bacterial communities in sediments of urban mangrove forests.  
277 *FEMS Microbiol. Ecol.* 2008, **66(1)**, 96-109.
- 278 6. Kulkarni, R., Deobagkar, D., Zinjarde, S. Metals in mangrove ecosystems and associated  
279 biota: A global perspective *Ecotoxicol. Environ. Safety* 2018, **153**, 215–228
- 280 7. Kandasamy, K. A. Review of studies on Pichavaram mangrove, Southeast India  
281 *Hydrobiologia* 2000, **430(1)**, 185-205
- 282 8. Ragavan P. Mohan, P. M. Saxena, A. Jayaraj, R. S. C. Ravichandran, K. Saxena, M.  
283 Mangrove floristics of the Andaman and Nicobar Islands: critical review and current scenario  
284 *Marine Biodiver.* 2016, 1-21 <https://doi.org/10.1007/s12526-016-0581-3>
- 285 9. Upadhyay, V.P., Ranjan, R. and Singh, J.S. Human-mangrove conflicts, The way out. *Curr.*  
286 *Sci.* 2002, **83**, 1328–1336.
- 287 10. Gomes, N.C.M. *et al.*, Taking root, enduring effect of rhizosphere bacterial colonization in  
288 mangroves. *PLoS ONE* 2010, **5(11)**, e14065.
- 289 11. Taketani, R.G., Yoshiura, C.A., Dias, A.C.F., Andreote, F.D. and Tsai, S.M. Diversity and  
290 identification of methanogenic archaea and sulphate-reducing bacteria in sediments from a  
291 pristine tropical mangrove. *A van Leeuw J. Microb.* 2010, **97(4)**, 401–411.

- 292 12. Ghosh, A., Dey, N. and Bera, A. Culture independent molecular analysis of bacterial  
293 communities in the mangrove sediment of Sundarbans, India. *Saline Syst.* 2010, **6(1)**, 1  
294 <http://dx.doi.org/10.1186/1746-1448-6-1>.
- 295 13. Mishra, R.R., Swain, M.R., Dangar, T.K. and Thatoi, H. Diversity and seasonal fluctuation  
296 of predominant microbial communities in Bhitarkanika, a tropical mangrove ecosystem in  
297 India. *Rev. Biol. Trop.* 2012, **60(2)**, 909-924.
- 298 14. Andreote, F.D. *et al.*, The microbiome of Brazilian mangrove sediments as revealed by  
299 metagenomics. *PLoS One.* 2012, **7(6)**, e38600.
- 300 15. Jiang, X.T., Peng, X., Deng, G.H., Sheng, H.F., Wang, Y. and Zhou, H.W. Illumina  
301 sequencing of 16S rRNA tag revealed spatial variations of bacterial communities in a  
302 mangrove wetland. *Microb. Ecol.* 2013, **66**, 96–104.
- 303 16. Basak, P. *et al.*, Spatiotemporal analysis of bacterial diversity in sediments of Sundarbans  
304 using parallel 16S rRNA gene tag sequencing. *Microb. Ecol.* 2014, **69**, 500–511.
- 305 17. Prakash, S. *et al.*, Influence of physicochemical and nutritional factors on bacterial diversity  
306 in mangrove sediments along the southwest coast of Tamilnadu, India. *Environ Monit.*  
307 *Assess.* 2015, **187**, 562.
- 308 18. Basak, P. *et al.*, Bacterial diversity assessment of pristine mangrove microbial community  
309 from Dhulibhashani, Sundarbans using 16S rRNA gene tag sequencing. *Genomics Data.*  
310 2016, **7**, 76-78.
- 311 19. Alzubaidy, H. *et al.*, Rhizosphere microbiome metagenomics of gray mangroves (*Avicennia*  
312 *marina*) in the Red Sea. *Gene.* 2016, **576**, 626–636
- 313 20. Imchen, M. *et al.*, Searching for signatures across microbial communities: Metagenomic  
314 analysis of soil samples from mangrove and other ecosystems *Sci. Rep.*, 2017, **7**, 859

- 315 21. ImchenM. et al., Comparative mangrove metagenome reveals global prevalence of heavy  
316 metals and antibiotic resistome across different ecosystems *Sci. Rep.*, 2018, **8**,11187.
- 317 22. Giri, C. *et al.*, Status and distribution of mangrove forests of the world using earth  
318 observation satellite data. *Global Ecol. Biogeogr.* 2011, **20**, 154–159.
- 319 23. Sahu, S.C., Suresh, H.S., Murthy, I.K. and Ravindranath, N.H. Mangrove Area Assessment  
320 in India, Implications of Loss of Mangroves. *J. Earth Sci. Clim. Change.* 2015, **6**, 280. doi,  
321 10.4172/2157-7617.1000280
- 322 24. Paingankar, M.S. and Deobagkar, D.D. Pollution and environmental stressors modulate the  
323 microbiome in estuarine mangroves: a metagenome analysis. *Curr. Sci.* (In Press)
- 324 25. Huson, D.H., Beier, S., Flade, I., Górska, A., El-Hadidi, M., Mitra, S., et al. MEGAN  
325 Community Edition - Interactive Exploration and Analysis of Large-Scale Microbiome  
326 Sequencing Data. *PLoS Comput. Biol.*, 2016, **12(6)**, e1004957.  
327 <https://doi.org/10.1371/journal.pcbi.1004957> (<https://github.com/danielhuson/megan-ce>)
- 328 26. Jha, S.K., Chavan, S.B., Pandit, G.G., Negi, B.S. and Sadasivan, S. Behaviour and fluxes of  
329 trace and toxic elements in creek sediment near Mumbai, India. *Environ. Monit. Assess.* 2002,  
330 **76**, 249–262.
- 331 27. Fernandes, L., Nayak, G.N., Ilangovan, D. and Borole, D.V. Accumulation of sediment,  
332 organic matter and trace metals with space and time, in a creek along Mumbai coast, India.  
333 *Estuar. Coast Shelf Sci.* 2011,**91**, 388–399.
- 334 28. Lyimo, T.J., Pol, A. and Op den Camp, H.J.M. methane emission, sulphide concentration and  
335 redox potential profiles in Mtoni mangrove sediment, Tanzania. *Western Indian Ocean J.*  
336 *Mar. Sci.* 2002, **1**, 71–80.

- 337 29. Lyimo, T.J., Pol, A. and Op den Camp, H.J.M. Sulfate reduction and methanogenesis in  
338 sediments of Mtoni mangrove forest, Tanzania. *Ambio*. 2002, **31**, 614–616.
- 339 30. Bagwell, C.E., La Rocque, J.R., Smith, G.W., Polson, S.W., Friez. M.J., Longshore, J.W. and  
340 Lovell CR. Molecular diversity of diazotrophs in oligotrophic tropical seagrass bed  
341 communities. *FEMS Microb. Ecol.* 2002, **39**, 113– 119.
- 342 31. Bird, C., Martinez, J.M., O'Donnell, A.G. and Wyman, M. Spatial distribution and  
343 transcriptional activity of an uncultured clade of planktonic diazotrophic  $\gamma$ -proteobacteria in  
344 the Arabian Sea. *Appl. Environ. Microbiol.* 2005, **71**, 2079– 2085.
- 345 32. Church, M.J., Short, C.M., Jenkins, B.D., Karl, D.M. and Zehr, J.P. Temporal patterns of  
346 nitrogenase gene (*nifH*) expression in the oligotrophic North Pacific Ocean. *Appl. Environ.*  
347 *Microbiol.* 2005, **71**, 5362– 5370.
- 348 33. Kim, S.J. and Kwon, K.K. Bacteroidetes, Handbook of Hydrocarbon and Lipid  
349 Microbiology, 2010, pp 1813–1817.
- 350 34. Muyzer, G. and Stams, A.J. The ecology and biotechnology of sulphate-reducing bacteria.  
351 *Nat. Rev. Microbiol.* 2008, **6(6)**, 441-454.
- 352 35. Lyimo, T.J., Pol, A. and Op den Camp, H.J.M. Sulfate reduction and methanogenesis in  
353 sediments of Mtoni mangrove forest, Tanzania. *Ambio*. 2002, **31**, 614–616.
- 354 36. Muyzer, G. and Stams, A.J. The ecology and biotechnology of sulphate-reducing bacteria.  
355 *Nat. Rev. Microbiol.* 2008, **6(6)**, 441-454.
- 356 37. Alongi, D.M., Boto, K.G. and Robertson, A.I. Nitrogen and Phosphorus Cycles in Tropical  
357 Mangrove Ecosystems, Am GeophysUniv, Washington DC. 1992, **41**,251–292
- 358 38. Rodríguez, H. and Fraga R. Phosphate solubilizing bacteria and their role in plant growth  
359 promotion. *Biotechnol. Adv.* 1999, **17 (4–5)**, 319–339.



360 39. Terrat S, Horrigue W, Dequiedt S, Saby NPA, Lelièvre M, Nowak V, et al. Mapping and  
361 predictive variations of soil bacterial richness across France. *PLoS ONE* 2017, **12(10)**,  
362 e0186766.

363 40. Griffiths RI, Thomson BC, Plassart P, Gweon HS, Stone D, Creamer RE, et al. Mapping and  
364 validating predictions of soil bacterial biodiversity using European and national scale  
365 datasets. *Appl Soil Ecol* 2016, **97**, 61–68.

366

### 367 **Figure Legends**

368 **Figure 1:** Sampling sites: Mangrove soil samples were collected from different locations from  
369 eusturine mangrove along the coast of Arabian Sea.

370 **Fig. 2** Distribution of predominant bacterial class in samples based on 16S rRNA gene  
371 sequencing. A) Class distribution Observations are displayed as stacked bar charts for individual  
372 mangrove sample (x-axis) against the percent class abundance (y-axis). B) Rarefaction curves for  
373 mangrove samples

374 **Figure 3:** A) Principal coordinate analysis (PCoA) of the bacterial communities derived from the  
375 weighted UniFrac distance matrix. B) Neighbor-joining phylogenetic tree

376 **Figure 4:** A Canonical correlation analysis (CCorA) B) Mantel Test

377 **Figure 5:** GIS based prediction of sulphur utilizing bacteria in Maharashtra

378 **Figure 6:** Microbial diversity at various mangrove sites

379

380 **Supplementary Information Table S1:** Information of sampling sites

381 **Supplementary Information Table S2:** Information of chemical parameters of sampling sites

382 **Supplementary Information Table S3:** Information of bacterial species

383 **Supplementary Information Table S4:** Alpha Diversity Indices

384 **Supplementary Information Table S5:** Global beta diversity indices

385 **Supplementary Information Table S6:** Information of sampling sites used for GIS based

386 prediction

387 **Table 1: Details of soil samples collected from mangroves**

388

| <b>Place</b> | <b>District</b> | <b>Sample code</b> | <b>Latitude</b> | <b>Longitude</b> | <b>River</b>     |
|--------------|-----------------|--------------------|-----------------|------------------|------------------|
| Anjarle      | Ratnagiri       | ADM1               | 17.840          | 73.101           | Jog River        |
| Anjarle      | Ratnagiri       | ADM2               | 17.843          | 73.103           | Jog River        |
| Kelashi      | Ratnagiri       | KLM1               | 17.928          | 73.074           | Bharja River     |
| Kelashi      | Ratnagiri       | KLM2               | 17.931          | 73.077           | Bharja River     |
| Bankot       | Ratnagiri       | BNMN1              | 17.958          | 73.031           | Savitri River    |
| Bankot       | Ratnagiri       | BNMN2              | 17.961          | 73.033           | Savitri River    |
| Uran         | Raigad          | ASUN1              | 18.896          | 72.939           |                  |
| Uran         | Raigad          | ASUN2              | 18.898          | 72.944           |                  |
| Agarkot      | Raigad          | ASWD1              | 18.546          | 72.934           | Kundalika River  |
| Agarkot      | Raigad          | ASWD2              | 18.549          | 72.943           | Kundalika River  |
| Vashim       | Raigad          | VASH1              | 18.812          | 73.033           | Patalganga River |
| Vashim       | Raigad          | VASH2              | 18.814          | 73.026           | Patalganga River |

389

390

391 **Figure 1:** Sampling sites: Mangrove soil samples were collected from different locations from  
392 eusturine mangrove along the coast of Arabian Sea.

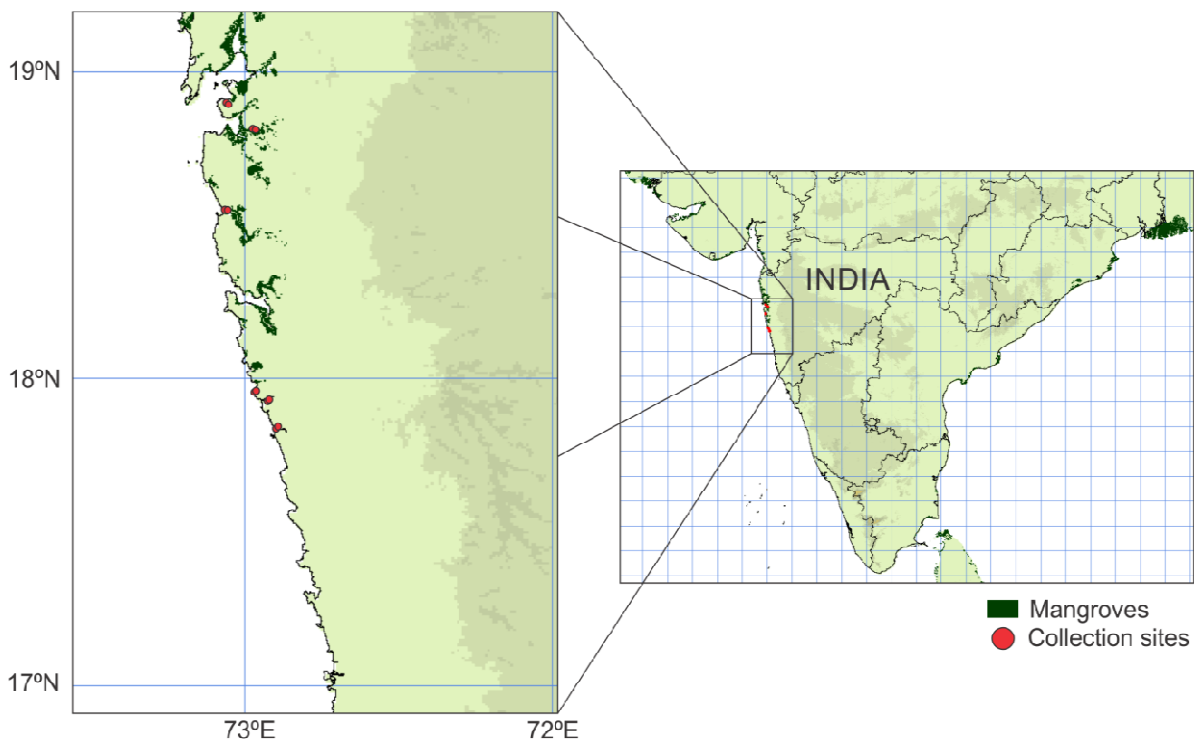

393

394

395 **Fig. 2** Distribution of predominant bacterial class in samples based on 16S rRNA gene  
396 sequencing. A) Class distribution Observations are displayed as stacked bar charts for individual  
397 mangrove sample (x-axis) against the percent class abundance (y-axis). B) Rarefaction curves for  
398 mangrove samples

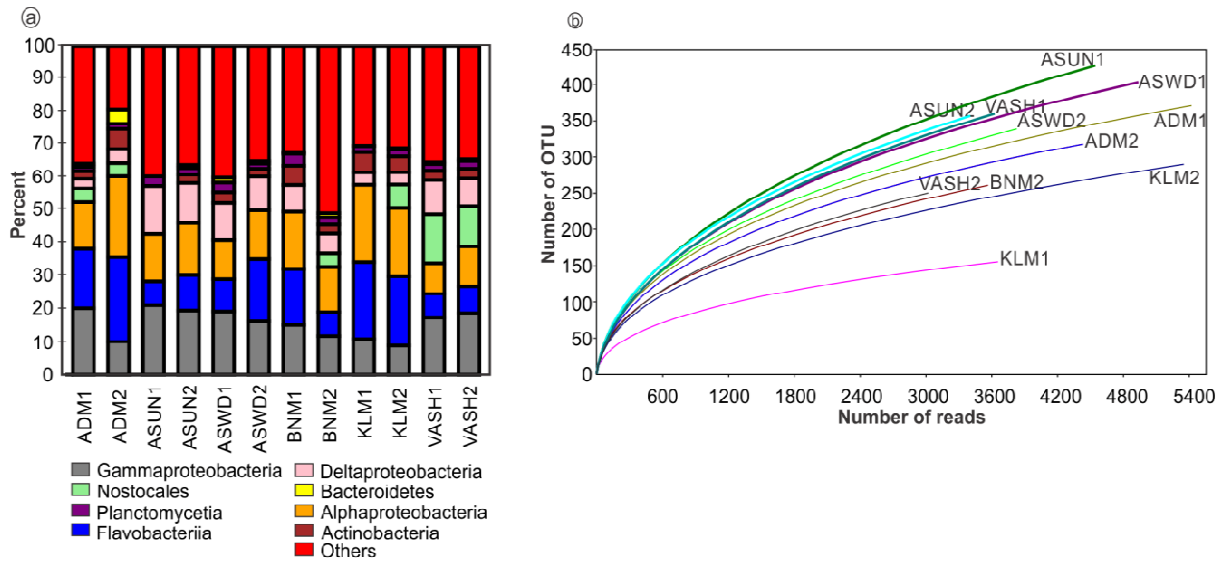

399

400

401 **Figure 3:** A) Principal coordinate analysis (PCoA) of the bacterial communities derived from the  
402 weighted UniFrac distance matrix. B) Neighbor-joining phylogenetic tree

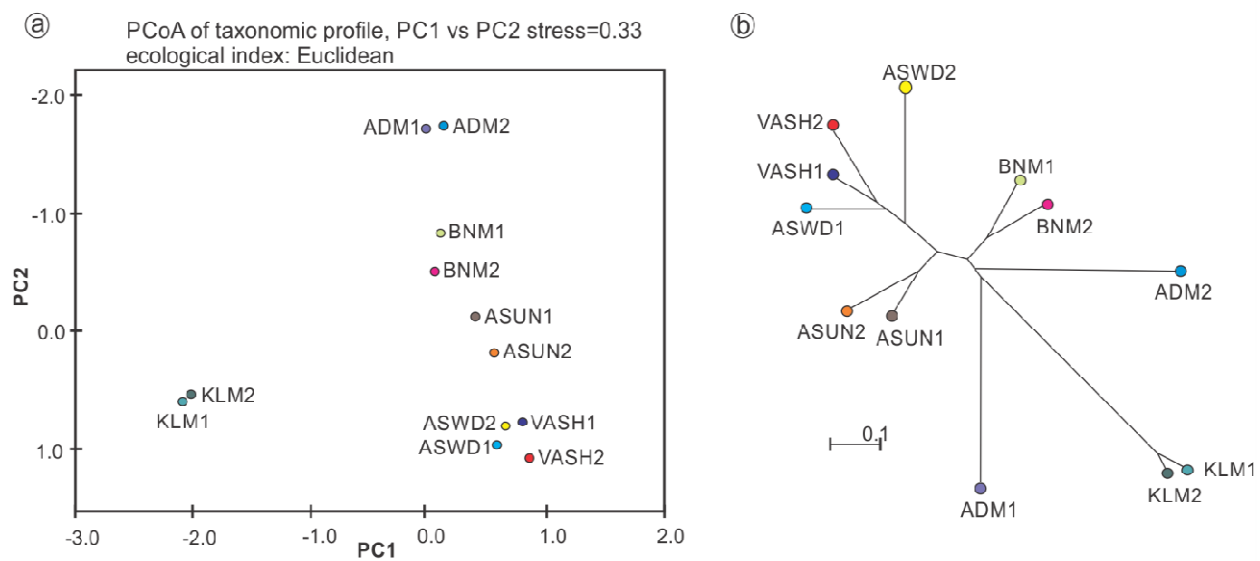

403

404

405 **Figure 4:** A Canonical correlation analysis (CCorA) B) Mantel Test

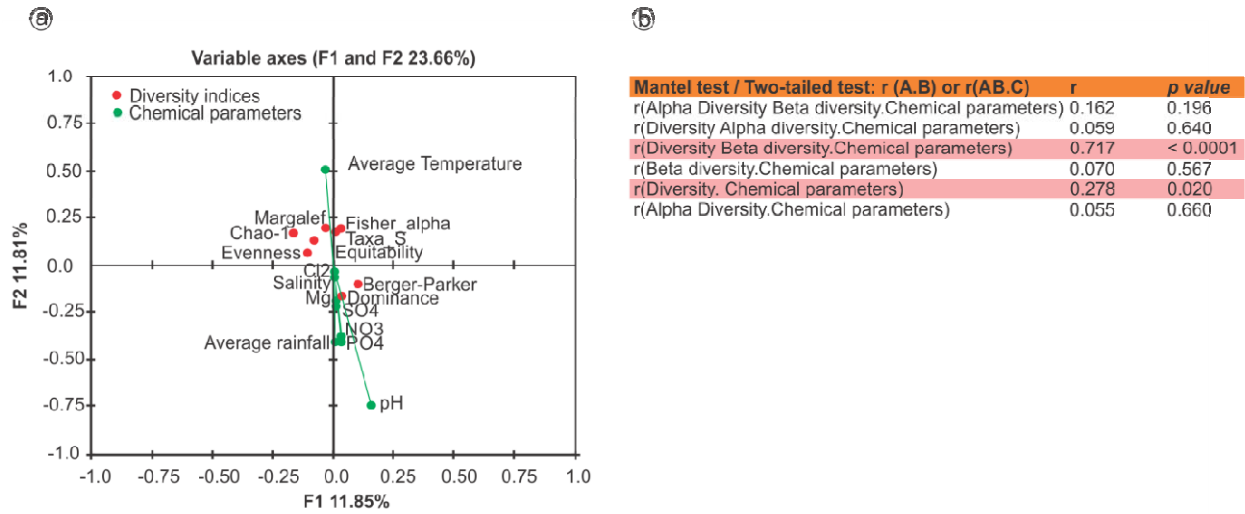

406

407

408 **Figure 5:** GIS based prediction of sulphur utilizing bacteria in Maharashtra

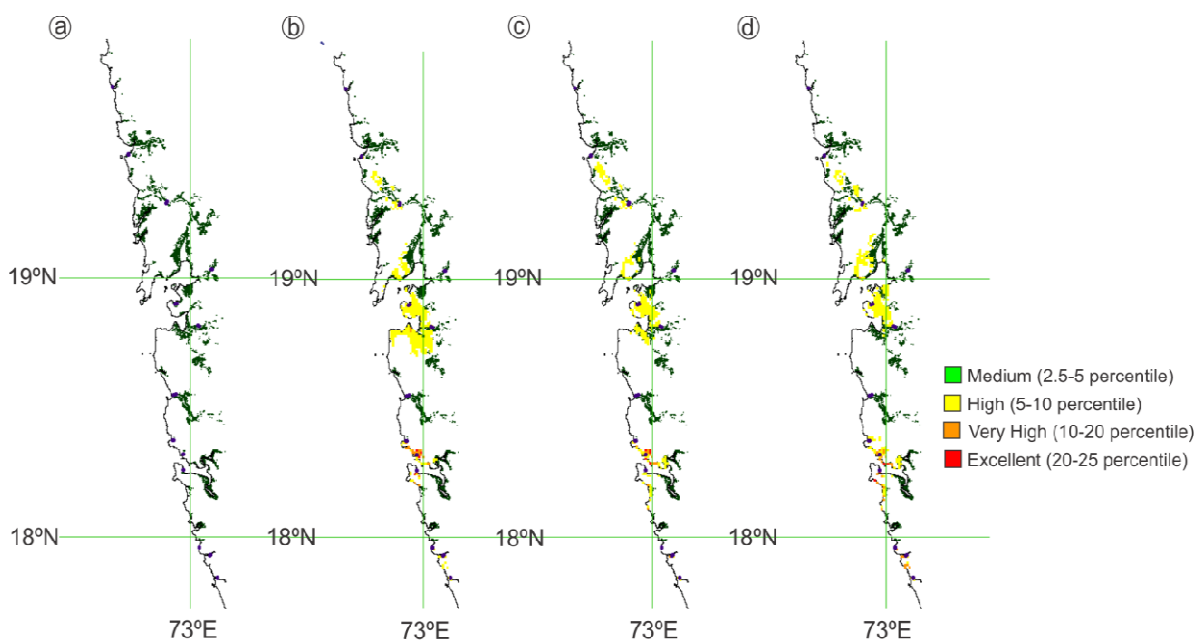



412 **Figure 6: Microbial diversity at various mangrove sites**

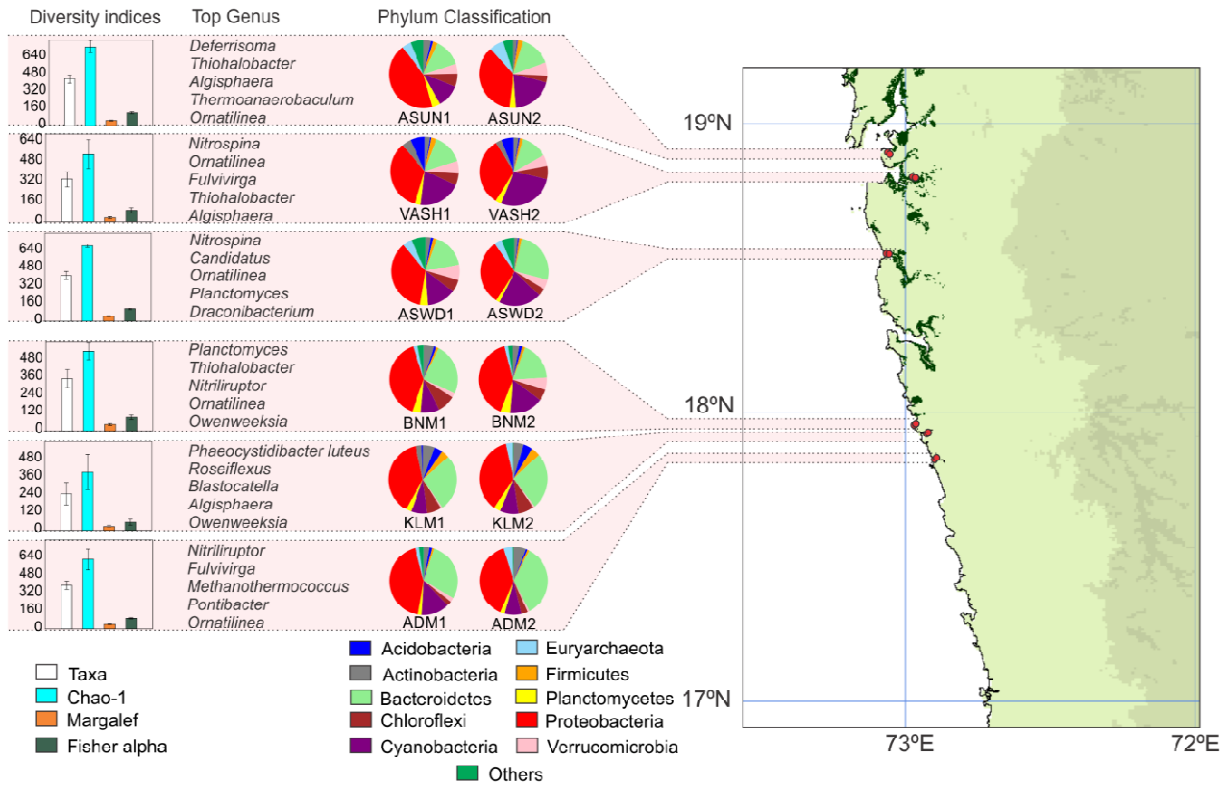

413
